# Supplementary material for: Long non‐coding subgenomic flavivirus RNAs have extended 3D structures and are flexible in solution
Source: PubMed Central journal article supplement (PMC6832101; doi:10.15252/embr.201847016), 2019-09-10
Supplement: EMBR-20-e47016-s001.pdf [file EMBR-20-e47016-s001.pdf]

## APPENDIX

### **Long non-coding subgenomic flavivirus RNAs have extended 3D structures and are flexible in solution**

Yupeng Zhang<sup>1,†</sup> Yikan Zhang<sup>1,†</sup>, Zhong-Yu Liu<sup>2, 3, 4,†</sup>, Meng-Li Cheng<sup>2, †</sup>, Junfeng Ma<sup>1</sup>, Yan Wang<sup>1</sup>, Cheng-Feng Qin<sup>2\*</sup>, Xianyang Fang<sup>1,\*\*</sup>

1 Beijing Advanced Innovation Center for Structural Biology, School of Life Sciences, Tsinghua University, Beijing 100084, China

2 State Key Laboratory of Pathogen and Biosecurity, Beijing Institute of Microbiology and Epidemiology, Beijing, 100071, China

3 Guangzhou Eighth People's Hospital, Guangzhou Medical University, Guangzhou, 510060, China

4 School of Medicine (Shenzhen), Sun Yat-sen University, Guangzhou, 510006, China

\*Corresponding author. Tel: +86 10 66948604; Email: qincf@bmi.ac.cn

\*\*Corresponding author. Tel: +86 10 62771071; E-mail: fangxy@tsinghua.edu.cn

†These authors contributed equally to this work

## Table of Contents

|                                                                                                                                                                             |         |
|-----------------------------------------------------------------------------------------------------------------------------------------------------------------------------|---------|
| <b>Appendix Table S1.</b> Basic structural parameters for DENV2-, ZIKV-, WNV- sfRNAs at various $Mg^{2+}$ concentrations.                                                   | Page 3  |
| <b>Appendix Table S2.</b> Basic structural parameters for subdomains of DENV2-, ZIKV-, WNV- sfRNAs at 5mM $Mg^{2+}$ concentrations.                                         | Page 4  |
| <b>Appendix Table S3.</b> The $R_g$ and $D_{max}$ values of the conformers in the selected minimal ensemble in comparison with that from ensemble averaged by EOM analysis. | Page 5  |
| <b>Appendix Table S4.</b> The primary sequences of full-length and subdomain constructs of DENV2-, ZIKV-, WNV- sfRNAs.                                                      | Page 6  |
| <b>Appendix Table S5.</b> Primers used for SHAPE analysis.                                                                                                                  | Page 8  |
| <b>Appendix Table S6.</b> SAXS data collection parameters and software employed for data analysis.                                                                          | Page 9  |
| <b>Appendix Table S7.</b> Primers used for plasmid construction and ZIKV detection.                                                                                         | Page 10 |

**Appendix Table S1. Basic structural parameters for DENV2-, ZIKV-, WNV- sfRNAs at various Mg<sup>2+</sup> concentrations.**

| Sample         | [MgCl <sub>2</sub> ](mM) | <sup>a</sup> R <sub>g</sub> (Å) | <sup>b</sup> R <sub>g</sub> (Å) | D <sub>max</sub> (Å) | <sup>c</sup> MW (kD) | <sup>d</sup> MW (kD) | <sup>DAMMIN</sup> χ <sup>2</sup> | NSD <sup>DAMMIN</sup> |
|----------------|--------------------------|---------------------------------|---------------------------------|----------------------|----------------------|----------------------|----------------------------------|-----------------------|
| DENV2- sfRNA   | 1                        | 82.5±1.5                        | 87.7±1.2                        | 313±2                | 137.21               | 128.90               | n/a                              | n/a                   |
|                | 2                        | 81.9±1.4                        | 87.7±1.1                        | 310±2                |                      | 130.18               |                                  |                       |
|                | 5                        | 79.6±1.1                        | 85.6±1.0                        | 305±2                |                      | 132.43               | 0.512±0.159                      | 1.141±0.030           |
|                | 10                       | 81.7±1.1                        | 85.7±0.9                        | 308±2                |                      | 145.45               |                                  |                       |
| ZIKV- sfRNA    | 1                        | 77.7±2.6                        | 86.2±1.8                        | 316±2                | 126.86               | 103.17               | n/a                              | n/a                   |
|                | 2                        | 77.1±1.2                        | 83.2±1.3                        | 303±2                |                      | 103.26               |                                  |                       |
|                | 5                        | 76.2±1.8                        | 82.0±1.2                        | 295±2                |                      | 106.25               | 0.499±0.220                      | 0.975±0.029           |
|                | 10                       | 77.2±1.3                        | 83.0±1.2                        | 300±2                |                      | 113.32               |                                  |                       |
| ZIKV-sfRNA+LNA | 5                        | 84.6±2.9                        | 93.2±2.3                        | 346±2                | 130.90               | 159.15               | n/a                              | n/a                   |
| WNV- sfRNA     | 1                        | 82.9±1.0                        | 89.2±1.1                        | 332±2                | 161.58               | 149.26               | n/a                              | n/a                   |
|                | 2                        | 81.4±1.0                        | 88.8±1.0                        | 325±2                |                      | 144.30               |                                  |                       |
|                | 5                        | 80.4±1.0                        | 86.2±0.8                        | 319±2                |                      | 150.43               | 1.065±0.341                      | 1.069±0.030           |
|                | 10                       | 82.0±1.8                        | 87.9±1.1                        | 322±2                |                      | 152.08               | n/a                              | n/a                   |

Buffer: 20mM Tris-HCl at pH 7.5, 100mM NaCl; <sup>a</sup> derived from Guinier fitting; <sup>b</sup> derived from GNOM analysis; <sup>c</sup>MW: molecular weight predicted from sequences; <sup>d</sup>MW: molecular weight calculated based on the power law of volume of correlation; n/a: not applicable.

**Appendix Table S2. Basic structural parameters for subdomains of DENV2-, ZIKV-, WNV- sRNAs at 5mM Mg<sup>2+</sup> concentrations.**

| Domain                | Type  | <sup>a</sup> R <sub>g</sub> (Å) | <sup>b</sup> R <sub>g</sub> (Å) | D <sub>max</sub> (Å) | <sup>c</sup> MW (kD) | <sup>d</sup> MW (kD) | <sup>e</sup> χ <sup>2</sup> | <sup>f</sup> χ <sup>2</sup> | <sup>g</sup> χ <sup>2</sup> | <sup>h</sup> χ <sup>2</sup> | NSD         |             |             |
|-----------------------|-------|---------------------------------|---------------------------------|----------------------|----------------------|----------------------|-----------------------------|-----------------------------|-----------------------------|-----------------------------|-------------|-------------|-------------|
| xrRNA1                | DENV2 | 22.1±0.02                       | 22.5±0.08                       | 80±2                 | 22.17                | 23.20                | 0.54                        | n/a                         | n/a                         | 0.084±0.028                 | 0.590±0.019 |             |             |
|                       | ZIKV  | 24.3±0.2                        | 25.3±0.1                        | 85±2                 | 24.16                | 22.14                | 0.82                        |                             |                             | 0.509±0.006                 | 0.659±0.017 |             |             |
|                       | WNV   | 24.0±0.2                        | 24.9±0.1                        | 84±2                 | 24.20                | 23.70                | 0.29                        |                             |                             | 0.521±0.006                 | 0.652±0.022 |             |             |
|                       | MVE   | 24.3±0.5                        | 26.0±0.2                        | 88±2                 | 26.15                | 26.28                | 0.36                        |                             |                             | 0.094±0.001                 | 0.676±0.020 |             |             |
| xrRNA2                | DENV2 | 21.9±0.01                       | 22.3±0.06                       | 76±2                 | 22.12                | 23.54                | 0.69                        |                             |                             | 0.118±0.037                 | 0.661±0.028 |             |             |
|                       | ZIKV  | 27.3±0.4                        | 28.0±0.2                        | 97±2                 | 22.88                | 22.71                | 0.68                        |                             |                             | 0.522±0.006                 | 0.615±0.013 |             |             |
|                       | WNV   | 22.5±0.2                        | 22.9±0.05                       | 77±2                 | 24.48                | 24.49                | 0.74                        |                             |                             | 0.316±0.012                 | 0.610±0.016 |             |             |
|                       | MVE   | 22.3±0.3                        | 23.0±0.1                        | 82±2                 | 22.61                | 23.98                | 0.30                        |                             |                             | 0.109±0.001                 | 0.632±0.022 |             |             |
| SL3                   | WNV   | 28.09±0.3                       | 29.2±0.07                       | 95±2                 | 24.82                | 24.68                | n/a                         |                             |                             | 0.87                        | 0.565±0.010 | 0.661±0.021 |             |
| xrRNA1-2              | DENV2 | 35.0±0.2                        | 36.6±0.1                        | 125±2                | 46.37                | 43.98                |                             |                             |                             | 0.44                        | n/a         | 0.511±0.033 | 0.830±0.028 |
|                       | ZIKV  | 38.5±1.0                        | 39.7±0.3                        | 142±2                | 49.67                | 44.65                |                             |                             |                             | 0.20                        |             | 0.151±0.003 | 0.782±0.025 |
|                       | WNV   | 47.4±0.8                        | 48.0±0.3                        | 174±2                | 75.20                | 73.57                |                             |                             |                             | 0.15                        |             | 0.159±0.024 | 0.768±0.031 |
| DB12                  | DENV2 | 46.1±2.0                        | 48.7±0.4                        | 162±2                | 56.00                | 51.40                |                             | n/a                         | 1.52                        | 0.103±0.004                 | 0.930±0.022 |             |             |
|                       | ZIKV  | 32.8±0.9                        | 33.1±0.6                        | 112±2                | 47.90                | 50.38                |                             |                             | 0.15                        | 0.097±0.001                 | 0.865±0.038 |             |             |
|                       | WNV   | 39.2±1.0                        | 39.6±0.4                        | 135±2                | 58.98                | 53.34                |                             |                             | 0.14                        | 0.158±0.001                 | 0.711±0.026 |             |             |
| DB12-PK3 <sup>a</sup> | ZIKV  | 43.8±0.9                        | 46.5±0.5                        | 169±2                | 47.9                 | 50.03                |                             |                             | n/a                         | n/a                         | n/a         | 0.857±0.023 |             |
|                       | WNV   | 46.4±1.9                        | 49.9±1.5                        | 179±2                | 58.98                | 54.35                |                             |                             |                             | n/a                         | n/a         | 0.859±0.025 |             |
| 3'SL                  | DENV2 | 35.9±0.5                        | 39.4±0.4                        | 142±2                | 31.47                | 28.77                |                             |                             |                             | 0.22                        | 0.191±0.003 | 0.583±0.021 |             |
|                       | ZIKV  | 39.5±0.9                        | 41.3±0.5                        | 141±2                | 32.28                | 27.13                |                             |                             |                             | 0.18                        | 0.061±0.002 | 0.654±0.012 |             |
|                       | WNV   | 35.4±0.5                        | 37.9±0.3                        | 132±2                | 32.22                | 26.84                |                             |                             |                             | 0.14                        | 0.136±0.006 | 0.649±0.010 |             |
| 3'SL-M                | WNV   | 36.8±2.2                        | 40.0±0.4                        | 135±2                | 32.18                | 34.98                | n/a                         |                             |                             | 0.578±0.004                 | 0.681±0.025 |             |             |

Buffer: 20mM Tris-HCl at pH 7.5, 100mM NaCl, 5mM MgCl<sub>2</sub>; <sup>a</sup> derived from Guinier fitting; <sup>b</sup> derived from GNOM analysis; <sup>c</sup>MW: molecular weight predicted from sequences; <sup>d</sup>MW: molecular weight calculated based on the power law of volume of correlation; <sup>e</sup>χ<sup>2</sup>: ModeRNA models fitting to experimental SAXS data; <sup>f</sup>χ<sup>2</sup>: Xplor-NIH rigid-body models fitting to experimental SAXS data; <sup>g</sup>χ<sup>2</sup>: Rosetta models fitting to experimental SAXS data; <sup>h</sup>χ<sup>2</sup>: DAMMIN bead models fitting to experimental SAXS data; n/a: not applicable.

**Appendix Table S3. The  $R_g$  and  $D_{max}$  values of the conformers in the selected minimal ensemble in comparison with that from ensemble averaged by EOM analysis.**

| RNA           | <i>Minimal Ensemble</i> |                 |                     | <i>Ensemble averaged</i> |                     |
|---------------|-------------------------|-----------------|---------------------|--------------------------|---------------------|
|               | Conformers              | $R_g(\text{Å})$ | $D_{max}(\text{Å})$ | $R_g(\text{Å})$          | $D_{max}(\text{Å})$ |
| DENV2-xrRNA12 | 1                       | 36.41           | 122.35              | 33.88                    | 112.94              |
|               | 2                       | 33.43           | 111.97              |                          |                     |
|               | 3                       | 31.79           | 104.49              |                          |                     |
| ZIKV-xrRNA12  | 1                       | 35.67           | 123.22              | 40.13                    | 133.92              |
|               | 2                       | 44.58           | 144.62              |                          |                     |
| WNV-xrRNA12   | 1                       | 49.22           | 164.71              | 47.53                    | 159.98              |
|               | 2                       | 45.85           | 155.24              |                          |                     |
| DENV2-DB12    | 1                       | 45.43           | 158.61              | 46.18                    | 153.97              |
|               | 2                       | 46.93           | 149.33              |                          |                     |
| DENV2-sfRNA   | 1                       | 89.58           | 290.29              | 81.69                    | 261.92              |
|               | 2                       | 65.05           | 208.78              |                          |                     |
|               | 3                       | 90.45           | 286.68              |                          |                     |
| ZIKV-sfRNA    | 1                       | 99.80           | 309.49              | 89.26                    | 290.36              |
|               | 2                       | 81.31           | 277.31              |                          |                     |
|               | 3                       | 86.66           | 284.28              |                          |                     |
| WNV-sfRNA     | 1                       | 87.91           | 278.86              | 85.35                    | 270.43              |
|               | 2                       | 89.73           | 289.24              |                          |                     |
|               | 3                       | 78.41           | 243.19              |                          |                     |

**Appendix Table S4. The primary sequences of full-length and subdomain constructs of DENV2-, ZIKV-, WNV- sfRNAs.**

| Source | Construct             | Primary sequence                                                                                                                                                                                                                                                                                                                                                                                                                                                                                                                                                                                                                                        |
|--------|-----------------------|---------------------------------------------------------------------------------------------------------------------------------------------------------------------------------------------------------------------------------------------------------------------------------------------------------------------------------------------------------------------------------------------------------------------------------------------------------------------------------------------------------------------------------------------------------------------------------------------------------------------------------------------------------|
| DENV2  | Full-length ( 423nt ) | <sup>1</sup> GGAGUCAGGUCGGAUUAAGCCAUAGUAC<br>GGAAAAACUAUGCUACCUUGAGCCCC<br>GUCCAAGGACG <sup>68</sup> UAAAAAGAA <sup>77</sup> GUCAGG<br>CCAUUACAAAUGCCAUAGCUUGAGUAAA<br>CUGUGCAGCCUGUAGCUCCACCUGAGAA<br>GGUG <sup>143</sup> UAAAAAAUCU <sup>153</sup> GGGAGGCCACA<br>AACCAUGGAAGCUGUACGCAUGGCGUAG<br>UGGACUAGCGGUUAGAGGAGACCCCUCC<br>CUUACAAAUCGCAGCAA <sup>237</sup> CAAU <sup>241</sup> GGGG<br>GCCCCAAGGUGAGAUGAAGCUGUAGUCUC<br>ACUGGAAGGACUAGAGGUUAGAGGAGAC<br>CCCCCAAACAAAAACAGCAU <sup>324</sup> AUUG<br>A <sup>329</sup> CGCUGGGAAAGACCAGAGAUCUGCU<br>GUCUCCUCAGCAUCAUCCAGGCACAGA<br>ACGCCAGAAAUGGAAUGGUGCUGUUGA<br>AUCAACAGGUUC <sup>423</sup> U |
|        | xrRNA1 (68nt)         | <sup>1</sup> G - <sup>19</sup> G <sup>20</sup> C - <sup>68</sup> U                                                                                                                                                                                                                                                                                                                                                                                                                                                                                                                                                                                      |
|        | xrRNA2 (69nt)         | GG <sup>77</sup> G - <sup>94</sup> G <sup>95</sup> C - <sup>143</sup> U                                                                                                                                                                                                                                                                                                                                                                                                                                                                                                                                                                                 |
|        | DB1 (85nt)            | <sup>153</sup> G - <sup>237</sup> C                                                                                                                                                                                                                                                                                                                                                                                                                                                                                                                                                                                                                     |
|        | DB2 (84nt)            | <sup>241</sup> G - <sup>324</sup> A                                                                                                                                                                                                                                                                                                                                                                                                                                                                                                                                                                                                                     |
|        | 3'SL (95nt)           | GG <sup>329</sup> C - <sup>423</sup> U                                                                                                                                                                                                                                                                                                                                                                                                                                                                                                                                                                                                                  |
|        | xrRNA1-2 (143nt)      | <sup>1</sup> G - <sup>74</sup> G <sup>75</sup> A - <sup>143</sup> U                                                                                                                                                                                                                                                                                                                                                                                                                                                                                                                                                                                     |
|        | DB1-2 (172nt)         | <sup>153</sup> G - <sup>324</sup> A                                                                                                                                                                                                                                                                                                                                                                                                                                                                                                                                                                                                                     |
| ZIKV   | Full-length ( 412nt ) | <sup>1</sup> UGUCAGGCCUGCUAGUCAGCCACAGCUU<br>GGGGAAAGCUGUGCAGCCUGUGACCCCC<br>CCAGGAGAAGCUGGG <sup>72</sup> AAACCAAGCCCA<br>U <sup>85</sup> AGUCAGGCCGAGAACGCCAUGGCACG<br>GAAGAAGCCAUGCUGCCUGUGAGCCCCU<br>CAGAGGACACUGAG <sup>153</sup> UCAAAAAACCCCA<br>C <sup>167</sup> GCGCUUGGAGGCGCAGGAUGGGAAAA<br>GAAGGUGGCGACCUUCCCCACCCUUUAA<br>UCUGGGGCCUGAACUGGAGAUACAGCUGU<br>GGAUCUCCAGAAGAGGGACUAGUGGUUA<br>GAGGAGACCCCCCGAAAACGCAAAACA<br>GCAUAU <sup>312</sup> GACGCUGGGAAAGACCAGAG<br>ACUCCAUGAGUUUCCACCACGCUGGCCGC<br>CAGGCACAGAUCCCGAAUAGCGGCCGC<br>CGGUGUGGGGAAAUCAUGGGUC <sup>412</sup> U                                                            |
|        | xrRNA1(72nt)          | GG <sup>1</sup> U - <sup>72</sup> A                                                                                                                                                                                                                                                                                                                                                                                                                                                                                                                                                                                                                     |
|        | xrRNA2(69nt)          | G <sup>85</sup> A - <sup>153</sup> U                                                                                                                                                                                                                                                                                                                                                                                                                                                                                                                                                                                                                    |
|        | 3'SL(98nt)            | G <sup>315</sup> G - <sup>412</sup> U                                                                                                                                                                                                                                                                                                                                                                                                                                                                                                                                                                                                                   |
|        | xrRNA1-2(153nt)       | <sup>1</sup> U - <sup>153</sup> U                                                                                                                                                                                                                                                                                                                                                                                                                                                                                                                                                                                                                       |

|              |                          |                                                                                                                                                                                                                                                                                                                                                                                                                                                                                                                                                                                                                                                                                                                                                                                              |
|--------------|--------------------------|----------------------------------------------------------------------------------------------------------------------------------------------------------------------------------------------------------------------------------------------------------------------------------------------------------------------------------------------------------------------------------------------------------------------------------------------------------------------------------------------------------------------------------------------------------------------------------------------------------------------------------------------------------------------------------------------------------------------------------------------------------------------------------------------|
|              | DB12(146nt)              | <sup>167</sup> G - <sup>200</sup> GC <sup>202</sup> G - <sup>312</sup> G                                                                                                                                                                                                                                                                                                                                                                                                                                                                                                                                                                                                                                                                                                                     |
|              | DB12-PK3 <sup>s</sup>    | <sup>167</sup> G - <sup>200</sup> CG <sup>202</sup> C - <sup>312</sup> G                                                                                                                                                                                                                                                                                                                                                                                                                                                                                                                                                                                                                                                                                                                     |
|              | LNA                      | <sup>+</sup> C <sup>+</sup> G <sup>+</sup> T <sup>+</sup> GGGG <sup>+</sup> TTTT <sup>+</sup> T <sup>+</sup> GA                                                                                                                                                                                                                                                                                                                                                                                                                                                                                                                                                                                                                                                                              |
| WNV          | Full-length<br>( 525nt ) | <sup>1</sup> GGAGUCAGGCCAGAUUAAUGCUGCCACC<br>GGAAGUUGAGUAGACGGUGCUGCCUGCG<br>GCUCAACCCAGGAGGACUGG <sup>78</sup> GUGACC<br>AAA <sup>87</sup> GCUGCGAGGUGAUCCACGUAAGCC<br>CUCAGAACCGUCUCGGAAGGAGGACCCC<br>ACGUGCUUUAGCCUCAAGG <sup>158</sup> CCCA <sup>162</sup> GUG<br>UCAGACCACACUCUAGUGUGCCACUCUCG<br>GGAGAGUGCAGUCUGCGAUAGUGCCCCA<br>GGUGGACUGG <sup>232</sup> GUUAACAAA <sup>241</sup> GGCAA<br>ACAUCGCCCCACGCGGCCAUAACCCUGGC<br>UAUGGUGUUAACCAGGGAGAAGGGACUA<br>GAGGUUAGAGGAGACCCCGCUCAAAAA<br>GUGCACGGCCCAACUUGGCUGAAGCUGU<br>AAGCCAAGGGAAGGACUAGAGGUUAGAG<br>GAGACCCCGUGCCAAAAACACCAAAGA<br>AACAGC <sup>422</sup> AUAUUGA <sup>429</sup> CACCUGGGAUAG<br>ACUAGGGGAUCUUCUGCUCUGCACAACC<br>AGCCACACGGCACAGUGCGCCGAUUAAG<br>GUGGCUUGGUGGUGCGAGAACACAGGAUC <sup>5</sup><br><sup>25</sup> U |
|              | xrRNA1(78nt)             | <sup>1</sup> G - <sup>78</sup> G                                                                                                                                                                                                                                                                                                                                                                                                                                                                                                                                                                                                                                                                                                                                                             |
|              | xrRNA2(71nt)             | <sup>G</sup> <sup>162</sup> G - <sup>232</sup> G                                                                                                                                                                                                                                                                                                                                                                                                                                                                                                                                                                                                                                                                                                                                             |
|              | SL3(72nt)                | <sup>G</sup> <sup>87</sup> G - <sup>158</sup> C                                                                                                                                                                                                                                                                                                                                                                                                                                                                                                                                                                                                                                                                                                                                              |
|              | 3'SL(97nt)               | <sup>GG</sup> <sup>429</sup> C - <sup>438</sup> UAG <sup>441</sup> A - <sup>525</sup> U                                                                                                                                                                                                                                                                                                                                                                                                                                                                                                                                                                                                                                                                                                      |
|              | 3'SL-M                   | <sup>GG</sup> <sup>429</sup> C - <sup>438</sup> GUC <sup>441</sup> U - <sup>525</sup> U                                                                                                                                                                                                                                                                                                                                                                                                                                                                                                                                                                                                                                                                                                      |
|              | xrRNA1-2<br>(232nt)      | <sup>1</sup> G - <sup>232</sup> G                                                                                                                                                                                                                                                                                                                                                                                                                                                                                                                                                                                                                                                                                                                                                            |
|              | DB12(182nt)              | <sup>241</sup> G - <sup>279</sup> GGUG <sup>283</sup> U - <sup>422</sup> A                                                                                                                                                                                                                                                                                                                                                                                                                                                                                                                                                                                                                                                                                                                   |
|              | DB12-PK3 <sup>s</sup>    | <sup>241</sup> G - <sup>279</sup> CCAC <sup>283</sup> A - <sup>422</sup> A                                                                                                                                                                                                                                                                                                                                                                                                                                                                                                                                                                                                                                                                                                                   |
|              | MVEV                     | xrRNA1(80nt)                                                                                                                                                                                                                                                                                                                                                                                                                                                                                                                                                                                                                                                                                                                                                                                 |
| xrRNA2(69nt) |                          | <sup>1</sup> GGUGUCAGAUCGGCGAAAGUCGCCACUU<br>CGCCGAGGAGUGCAAUCUGUGAGGCCCC<br>AGGAGGACUGGG <sup>69</sup> U                                                                                                                                                                                                                                                                                                                                                                                                                                                                                                                                                                                                                                                                                    |

**Appendix Table S5. Primers used for SHAPE analysis.**

| <b>Primers</b>    | <b>Sequences (5'-3')</b> | <b>5' modifications</b> | <b>Applications</b>                           |
|-------------------|--------------------------|-------------------------|-----------------------------------------------|
| P-WNV3UTR-R1-FAM  | AGATCCTGTGTTCTCGCACCAC   | FAM                     | Primer extension for the SHAPE reactions      |
| P-WNV3UTR-R1-HEX  | AGATCCTGTGTTCTCGCACCAC   | HEX                     | Primer extension for the sequencing reactions |
| P-WNV3UTR-R2-FAM  | CCTTTGTTAACCCAGTCCAC     | FAM                     | Primer extension for the SHAPE reactions      |
| P-WNV3UTR-R2-HEX  | CCTTTGTTAACCCAGTCCAC     | HEX                     | Primer extension for the sequencing reactions |
| P-ZIKV3UTR-R1-FAM | CCAGCGTGGTGGAAACTC       | FAM                     | Primer extension for the SHAPE reactions      |
| P-ZIKV3UTR-R1-HEX | CCAGCGTGGTGGAAACTC       | HEX                     | Primer extension for the sequencing reactions |
| P-ZIKV3UTR-R2-FAM | CACCTTCTTTTCCCATCCT      | FAM                     | Primer extension for the SHAPE reactions      |
| P-ZIKV3UTR-R2-HEX | CACCTTCTTTTCCCATCCT      | HEX                     | Primer extension for the sequencing reactions |

**Appendix Table S6. SAXS data collection parameters and software employed for data analysis.**

| <b><i>Data Collection Parameters</i></b> |                           |                     |
|------------------------------------------|---------------------------|---------------------|
| Facilities and parameters                | Settings and values       |                     |
| Beam line                                | 12ID-B ( APS, ANL)        | BL19U2 (SSRF)       |
| Wavelength (Å)                           | 0.8857                    | 1.033               |
| Detector                                 | Pilatus 1M (SAXS)         | Pilatus 100K (SAXS) |
| $q$ range (Å <sup>-1</sup> )             | 0.005-0.89                | 0.009-0.415         |
| Exposure time (s)                        | 30-60                     | 60                  |
| Concentration range ( mg/ml)             | 0.75-3                    | 0.75-3              |
| Temperature (K)                          | 298                       | 298                 |
| <b><i>Software Employed</i></b>          |                           |                     |
| Primary Data Processing                  | Matlab/BioXTAS RAW/PRIMUS |                     |
| $P(r)$ Function                          | GNOM                      |                     |
| <i>Ab initio</i> Shape Analysis          | DAMMIN                    |                     |
| SAXS Profile Computation                 | CRY SOL                   |                     |
| Homology modeling                        | ModeRNA                   |                     |
| de novo RNA modeling                     | Rosetta                   |                     |
| Rigid-body Modeling                      | Xplor-NIH                 |                     |
| Flexibility Analysis                     | EOM/Xplor-NIH             |                     |
| Superposition and averaging              | SUPCOMB/DAMAV ER          |                     |
| Molecular Visualization                  | PyMol/Situs/Chimera       |                     |

**Appendix Table S7. Primers used for plasmid construction and ZIKV detection.**

| <b>Primers</b>                 | <b>Sequences (5'-3')</b>                       | <b>Applications</b>                                                   |
|--------------------------------|------------------------------------------------|-----------------------------------------------------------------------|
| P-ZIKV/Rep-PK3 <sup>^</sup> -F | CCCCGGAAAAagaAAAACAGCATATTG                    | Primer for ZIKV-PK3 <sup>^</sup> or Rep-PK3 <sup>^</sup> construction |
| P-ZIKV/Rep-PK3 <sup>^</sup> -R | GGTCTCCTCTAACCACTAG                            | Primer for ZIKV-PK3 <sup>^</sup> or Rep-PK3 <sup>^</sup> construction |
| P-ZIKV-PK3*-F                  | cttAATCTGGGGCCTGAACTG                          | Primer for ZIKV-PK3* construction                                     |
| P-ZIKV-PK3*-R                  | cgttAAAGGGTGGGGAAGGTCG                         | Primer for ZIKV-PK3* construction                                     |
| P-Rep-PK3*-F                   | cttAATCTGGGGCCTGAACTG                          | Primer for Rep-PK3* construction                                      |
| P-Rep-PK3*-R                   | cgttGAAGGGTGGGGAAGGTCG                         | Primer for Rep-PK3* construction                                      |
| P-Rep-GAA-F                    | AGTCAGTGGAgcagcaTGCGTTGTGAAGC                  | Primer for the Rep-GAA construction                                   |
| P-Rep-GAA-R                    | GCCATTCGTTTGAGCCTA                             | Primer for the Rep-GAA construction                                   |
| P-ZIKV-F                       | CCGCTGCCCAACACAAG                              | Primer for detection of viral RNA                                     |
| P-ZIKV-R                       | CCACTAACGTTCTTTTGCAGACAT                       | Primer for detection of viral RNA                                     |
| P-ZIKV-Probe                   | 6-FAM-AGCCTACCTTGACAAGCA<br>ATCAGACACTCAA-BHQ1 | Probe for detection of viral RNA                                      |
